# Supplementary material for: Real-time monitoring of suspension cell–cell communication using an integrated microfluidics
Source: Royal Society of Chemistry journal article supplement (doi:10.1039/c004844e), 2010-01-01
Supplement: fig_s2.pdf [file fig_s2.pdf]

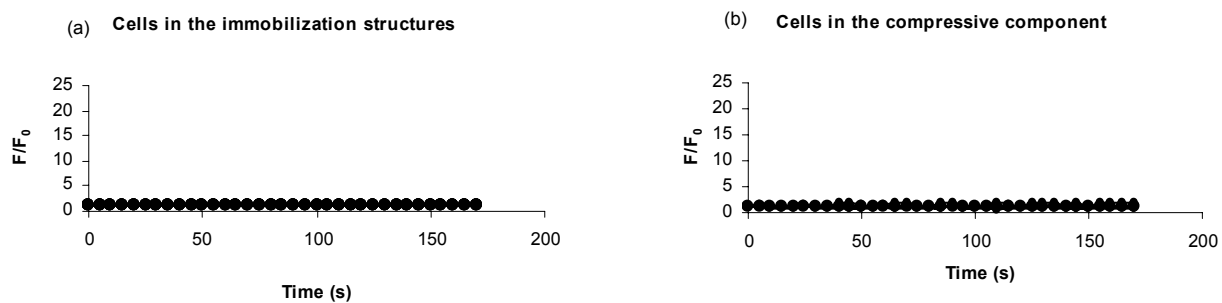

Supplementary Fig. S2 Control experiments of  $[Ca^{2+}]_i$  responses for trapped and recipient cells without membrane compression in (a) and (b). The traces of 10 cells in the compressive component were plotted in (a) and 18 cells in the sandbag structures were plotted in (b) respectively. Without membrane compression, no significant  $F/F_0$  changes were observed in the traces during the entire course of monitoring.
